# Supplementary material
Source: Springer Nature journal article supplement (http://www.springermedizin.de/resource/supplementary/12968_2012_2650_MOESM1_ESM.pdf/9582414)

**A**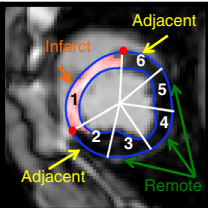**B**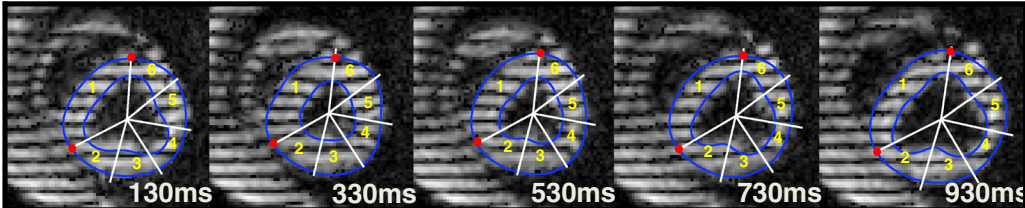

Supplement: MOESM1 [file 9582414]
